# Supplementary material for: Preparation of PDMS microfluidic devices based on drop-on-demand generation of wax molds
Source: Royal Society of Chemistry journal article supplement (doi:10.1039/c4ay00798k), 2014-01-01
Supplement: c4ay00798k2.pdf [file c4ay00798k2.pdf]

Table S1 Measurement of wax droplets generated by micronozzle with outlet diameter of 140

$\mu m$

| Number               | By 50V | By 60V | By 70V | By 80V |
|----------------------|--------|--------|--------|--------|
| 1                    | 200.0  | 255.2  | 286.3  | 318.9  |
| 2                    | 203.9  | 255.5  | 284.8  | 318.8  |
| 3                    | 196.4  | 255.2  | 287.7  | 315.3  |
| 4                    | 209.4  | 241.1  | 295.5  | 326.1  |
| 5                    | 203.0  | 242.2  | 291.6  | 314.2  |
| 6                    | 209.7  | 255.7  | 293.4  | 328.5  |
| 7                    | 200.3  | 243.4  | 292.4  | 327.2  |
| 8                    | 202.3  | 255.6  | 292.5  | 323.4  |
| 9                    | 208.2  | 236.2  | 285.5  | 313.1  |
| 10                   | 192.8  | 254.1  | 292.6  | 318.4  |
| 11                   | 204.7  | 255.9  | 284.0  | 328.2  |
| 12                   | 200.1  | 256.1  | 301.6  | 329.5  |
| 13                   | 195.6  | 244.7  | 295.2  | 326.2  |
| 14                   | 193.5  | 253.1  | 285.9  | 328.8  |
| 15                   | 210.2  | 254.9  | 282.1  | 329.6  |
| 16                   | 203.3  | 241.8  | 292.5  | 329.5  |
| Mean                 | 202.1  | 250.0  | 290.2  | 323.5  |
| Standard Deviation   | 5.6    | 7.0    | 5.2    | 6.0    |
| Variable Coefficient | 2.8%   | 2.8%   | 1.8%   | 1.9%   |
